# Supplementary material
Source: PubMed Central journal article supplement (PMC3593718)
Supplement: NIHMS397722-supplement-Supplemental_Table_3.pdf [file NIHMS397722-supplement-Supplemental_Table_3.pdf]

Supplemental Table 3. Association of autoimmune disease GWAS SNPs with cardiac NL

| SNP         | Chr | Pos (Mb) | Region       | MAF  |         | P-value  | Genetic model | OR [CI]          | HWE P-value |         | Disease | Ref                                |
|-------------|-----|----------|--------------|------|---------|----------|---------------|------------------|-------------|---------|---------|------------------------------------|
|             |     |          |              | case | control |          |               |                  | case        | control |         |                                    |
| rs6684865*  | 1   | 2.536    | MMEL1        | 0.41 | 0.33    | 1.50E-02 | add           | 1.39 [1.07-1.82] | 0.567       | 0.938   | RA      | WTCCC, Nature 447, 2007            |
| rs3890745   | 1   | 2.543    | MMEL1        | 0.37 | 0.31    | 9.60E-02 | add           | 1.26 [0.96-1.66] | 0.843       | 0.841   | RA      | Raychaudhuri, Nat Genet            |
| rs10492972* | 1   | 10.276   | KIF1B        | 0.41 | 0.33    | 2.49E-02 | add           | 1.36 [1.04-1.78] | 1.000       | 0.510   | MS      | Aulchenko, Nat Genet               |
| rs3806308   | 1   | 20.015   | RNF186       | 0.37 | 0.37    | 9.61E-01 | add           | 0.99 [0.76-1.3]  | 0.689       | 0.370   | UC      | Silverberg, Nat Genet              |
| rs10753575  | 1   | 20.036   | HTR6         | NA   | NA      | NA       | NA            | NA               | NA          | NA      | UC      | Silverberg et al, Nat Genet 2009   |
| rs6426833   | 1   | 20.044   | several      | 0.46 | 0.45    | 7.89E-01 | add           | 1.04 [0.8-1.35]  | 0.454       | 0.553   | UC      | Barrett Nat Genet 2009             |
| rs6426833   | 1   | 20.044   | several      | 0.46 | 0.45    | 7.89E-01 | add           | 1.04 [0.8-1.35]  | 0.454       | 0.553   | UC      | Silverberg, Nat Genet              |
| rs7524102   | 1   | 22.571   | Intergenic   | NA   | NA      | NA       | NA            | NA               | NA          | NA      | UC      | Barrett Nat Genet 2009             |
| rs11206377* | 1   | 39.822   | LOC100129342 | 0.42 | 0.42    | 9.48E-01 | add           | 1.01 [0.77-1.32] | 0.705       | 0.695   | BD      | Fei, Arthritis Res Ther            |
| rs2269241*  | 1   | 63.881   | PGM1         | 0.16 | 0.19    | 8.54E-02 | dom           | 0.69 [0.46-1.05] | 0.073       | 0.392   | T1D     | Barrett, Nat Genet                 |
| rs1004819   | 1   | 67.443   | IL23R        | 0.28 | 0.30    | 6.71E-01 | add           | 0.94 [0.7-1.25]  | 0.820       | 0.541   | CD      | Duerr et al, Science 314, 2006     |
| rs1004819   | 1   | 67.443   | IL23R        | 0.28 | 0.30    | 6.71E-01 | add           | 0.94 [0.7-1.25]  | 0.820       | 0.541   | UC      | Silverberg et al, Nat Genet 2009   |
| rs11805303* | 1   | 67.448   | IL23R        | 0.28 | 0.30    | 6.71E-01 | add           | 0.94 [0.7-1.25]  | 0.820       | 0.541   | CD      | WTCCC, Nature 447, 2007            |
| rs11805303* | 1   | 67.448   | IL23R        | 0.28 | 0.30    | 6.71E-01 | add           | 0.94 [0.7-1.25]  | 0.820       | 0.541   | UC      | Franke et al, Nat Genet 40, 2008   |
| rs7517847   | 1   | 67.454   | IL23R        | 0.42 | 0.42    | 5.47E-02 | rec           | 0.56 [0.31-1.01] | 0.004       | 0.645   | CD      | Duerr et al, Science 314, 2006     |
| rs7517847   | 1   | 67.454   | IL23R        | 0.42 | 0.42    | 5.47E-02 | rec           | 0.56 [0.31-1.01] | 0.004       | 0.645   | CD      | Rioux, Nat Genet                   |
| rs7517847   | 1   | 67.454   | IL23R        | 0.42 | 0.42    | 5.47E-02 | rec           | 0.56 [0.31-1.01] | 0.004       | 0.645   | IBD     | Duerr, Science                     |
| rs10489629  | 1   | 67.461   | IL23R        | 0.45 | 0.46    | 6.72E-01 | add           | 0.94 [0.73-1.23] | 0.577       | 1.000   | CD      | Duerr et al, Science 314, 2006     |
| rs2201841   | 1   | 67.467   | IL23R        | 0.30 | 0.31    | 9.47E-01 | add           | 0.99 [0.74-1.32] | 0.659       | 0.226   | CD      | Duerr et al, Science 314, 2006     |
| rs2201841   | 1   | 67.467   | IL23R        | 0.30 | 0.31    | 9.47E-01 | add           | 0.99 [0.74-1.32] | 0.659       | 0.226   | PS      | Nair, Nat Genet                    |
| rs11465804  | 1   | 67.475   | IL23R        | NA   | NA      | NA       | NA            | NA               | NA          | NA      | CD      | Duerr et al, Science 314, 2006     |
| rs11465804  | 1   | 67.475   | IL23R        | NA   | NA      | NA       | NA            | NA               | NA          | NA      | CD      | Libioulle, PLOS genetics 3, 2007   |
| rs11465804  | 1   | 67.475   | IL23R        | NA   | NA      | NA       | NA            | NA               | NA          | NA      | CD      | Barrett, Nat Genet                 |
| rs11465804  | 1   | 67.475   | IL23R        | NA   | NA      | NA       | NA            | NA               | NA          | NA      | UC      | Silverberg et al, Nat Genet 2009   |
| rs11209026  | 1   | 67.479   | IL23R        | NA   | NA      | NA       | NA            | NA               | NA          | NA      | CD      | Libioulle, PLoS Genet              |
| rs11209026  | 1   | 67.479   | IL23R        | NA   | NA      | NA       | NA            | NA               | NA          | NA      | IBD     | Duerr, Science                     |
| rs11209026  | 1   | 67.479   | IL23R        | NA   | NA      | NA       | NA            | NA               | NA          | NA      | IBD     | Kugathasan, Nat Genet              |
| rs11209026  | 1   | 67.479   | IL23R        | NA   | NA      | NA       | NA            | NA               | NA          | NA      | PsA     | Liu et al, PLoS Genetics 4, 2008   |
| rs11209026  | 1   | 67.479   | IL23R        | NA   | NA      | NA       | NA            | NA               | NA          | NA      | UC      | Barrett Nat Genet 2009             |
| rs11209026  | 1   | 67.479   | IL23R        | NA   | NA      | NA       | NA            | NA               | NA          | NA      | UC      | Silverberg et al, Nat Genet 2009   |
| rs11209026  | 1   | 67.479   | IL23R        | NA   | NA      | NA       | NA            | NA               | NA          | NA      | UC      | Silverberg, Nat Genet              |
| rs1343151   | 1   | 67.492   | IL23R        | 0.34 | 0.35    | 6.79E-01 | add           | 0.94 [0.71-1.25] | 0.682       | 0.360   | CD      | Duerr et al, Science 314, 2006     |
| rs10889677  | 1   | 67.498   | IL23R        | 0.30 | 0.31    | 9.46E-01 | add           | 0.99 [0.74-1.32] | 0.659       | 0.242   | CD      | Duerr et al, Science 314, 2006     |
| rs10889677  | 1   | 67.498   | IL23R        | 0.30 | 0.31    | 9.46E-01 | add           | 0.99 [0.74-1.32] | 0.659       | 0.242   | UC      | Silverberg, Nat Genet              |
| rs11209032  | 1   | 67.513   | IL23R        | 0.31 | 0.33    | 7.00E-01 | add           | 0.95 [0.71-1.25] | 0.828       | 0.146   | CD      | Duerr et al, Science 314, 2006     |
| rs12141391  | 1   | 72.047   | NEGR1        | NA   | NA      | NA       | NA            | NA               | NA          | NA      | SLE     | Hom, N Engl J Med                  |
| rs11162922  | 1   | 80.345   | intergenic   | NA   | NA      | NA       | NA            | NA               | NA          | NA      | RA      | WTCCC, Nature 447, 2007            |
| rs672797    | 1   | 81.333   | intergenic   | NA   | NA      | NA       | NA            | NA               | NA          | NA      | T1D     | Hakonarson et al, Nature 448, 2007 |

|             |   |         |              |      |      |          |     |                  |       |       |                   |                                    |
|-------------|---|---------|--------------|------|------|----------|-----|------------------|-------|-------|-------------------|------------------------------------|
| rs1983853*  | 1 | 85.084  | EDG7         | 0.08 | 0.12 | 1.79E-01 | add | 0.72 [0.45-1.16] | 0.552 | 0.933 | T1D               | Grant, Diabetes                    |
| rs6604026   | 1 | 93.076  | FAM69A,RPL5  | 0.27 | 0.28 | 8.00E-01 | add | 0.96 [0.72-1.29] | 0.816 | 0.863 | MS                | Bahlo, Nat Genet 2009              |
| rs6604026   | 1 | 93.076  | FAM69A,RPL5  | 0.27 | 0.28 | 8.00E-01 | add | 0.96 [0.72-1.29] | 0.816 | 0.863 | MS                | Hafner, N Engl J Med               |
| rs6679677*  | 1 | 114.105 | PTPN22       | 0.12 | 0.09 | 2.06E-01 | add | 1.3 [0.87-1.94]  | 1.000 | 0.026 | RA                | Raychaudhuri, Nat Genet            |
| rs6679677*  | 1 | 114.105 | PTPN22       | 0.12 | 0.09 | 2.06E-01 | add | 1.3 [0.87-1.94]  | 1.000 | 0.026 | RA                | WTCCC, Nature 447, 2007            |
| rs6679677*  | 1 | 114.105 | PTPN22       | 0.12 | 0.09 | 2.06E-01 | add | 1.3 [0.87-1.94]  | 1.000 | 0.026 | T1D               | Cooper, Nat Genet                  |
| rs6679677*  | 1 | 114.105 | PTPN22       | 0.12 | 0.09 | 2.06E-01 | add | 1.3 [0.87-1.94]  | 1.000 | 0.026 | T1D               | Todd, Nat Genet                    |
| rs6679677*  | 1 | 114.105 | PTPN22       | 0.12 | 0.09 | 2.06E-01 | add | 1.3 [0.87-1.94]  | 1.000 | 0.026 | T1D               | WTCCC, Nature 447, 2007            |
| rs2476601   | 1 | 114.179 | PTPN22       | 0.12 | 0.09 | 2.06E-01 | add | 1.3 [0.87-1.94]  | 1.000 | 0.026 | CD                | Barrett, Nat Genet                 |
| rs2476601   | 1 | 114.179 | PTPN22       | 0.12 | 0.09 | 2.06E-01 | add | 1.3 [0.87-1.94]  | 1.000 | 0.026 | RA                | Gregersen, Nat Genet               |
| rs2476601   | 1 | 114.179 | PTPN22       | 0.12 | 0.09 | 2.06E-01 | add | 1.3 [0.87-1.94]  | 1.000 | 0.026 | RA                | Julia et al, A&R 58, 2008          |
| rs2476601   | 1 | 114.179 | PTPN22       | 0.12 | 0.09 | 2.06E-01 | add | 1.3 [0.87-1.94]  | 1.000 | 0.026 | RA                | Plenge, N Engl J Med               |
| rs2476601   | 1 | 114.179 | PTPN22       | 0.12 | 0.09 | 2.06E-01 | add | 1.3 [0.87-1.94]  | 1.000 | 0.026 | T1D               | Barrett, Nat Genet                 |
| rs2476601   | 1 | 114.179 | PTPN22       | 0.12 | 0.09 | 2.06E-01 | add | 1.3 [0.87-1.94]  | 1.000 | 0.026 | T1D               | Hakonarson et al, Nature 448, 2007 |
| rs2476601   | 1 | 114.179 | PTPN22       | 0.12 | 0.09 | 2.06E-01 | add | 1.3 [0.87-1.94]  | 1.000 | 0.026 | T1D               | Hakonarson, Nature                 |
| rs2476601   | 1 | 114.179 | PTPN22       | 0.12 | 0.09 | 2.06E-01 | add | 1.3 [0.87-1.94]  | 1.000 | 0.026 | T1D               | Todd, Nat Genet                    |
| rs1335532   | 1 | 116.902 | CD58         | 0.13 | 0.13 | 8.29E-01 | add | 1.04 [0.71-1.54] | 1.000 | 0.938 | MS                | Bahlo, Nat Genet 2009              |
| rs2300747*  | 1 | 116.906 | CD58         | 0.13 | 0.13 | 8.29E-01 | add | 1.04 [0.71-1.54] | 1.000 | 0.938 | MS                | De Jager, Nat Genet 2009           |
| rs2358820   | 1 | 117.513 | VTCN1        | NA   | NA   | NA       | NA  | NA               | NA    | NA    | SLE               | Hinks et al, A&R 60, 2009          |
| rs12046117  | 1 | 117.553 | VTCN1        | NA   | NA   | NA       | NA  | NA               | NA    | NA    | SLE               | Hinks, Arthritis Rheum             |
| rs4085613*  | 1 | 150.817 | LCE3D, LCE3A | 0.31 | 0.36 | 1.23E-01 | add | 0.8 [0.6-1.06]   | 0.515 | 0.177 | PS                | Zhang, Nat Genet                   |
| rs2274910   | 1 | 159.119 | ITLN1        | 0.33 | 0.31 | 6.75E-01 | add | 1.06 [0.8-1.41]  | 0.674 | 0.543 | CD                | Barrett, Nat Genet                 |
| rs1801274   | 1 | 159.746 | FCGR2A       | 0.57 | 0.49 | 2.69E-02 | add | 1.36 [1.04-1.78] | 1.000 | 0.200 | UC                | Asano Nat Genet 2009               |
| rs2343331   | 1 | 161.197 | NR1I3, APOA2 | NA   | NA   | NA       | NA  | NA               | NA    | NA    | CD                | Rioux et al, Nat Genet 39, 2007    |
| rs9286879   | 1 | 171.129 | FMO cluster  | 0.28 | 0.25 | 2.87E-01 | add | 1.17 [0.88-1.56] | 1.000 | 0.616 | CD                | Barrett, Nat Genet                 |
| rs12035082* | 1 | 171.165 | FMO cluster  | 0.41 | 0.38 | 7.41E-02 | dom | 1.44 [0.97-2.15] | 0.082 | 0.419 | CD                | Parkes, Nat Genet                  |
| rs12037606  | 1 | 171.165 | FMO cluster  | NA   | NA   | NA       | NA  | NA               | NA    | NA    | CD                | WTCCC, Nature 447, 2007            |
| rs2205960   | 1 | 171.458 | TNFSF4       | 0.22 | 0.22 | 9.93E-01 | add | 1 [0.73-1.37]    | 0.592 | 0.454 | SLE               | Han Nat Genet 2009                 |
| rs10798269  | 1 | 171.576 | Intergenic   | 0.34 | 0.36 | 5.83E-01 | add | 0.92 [0.7-1.22]  | 0.101 | 0.851 | SLE in women      | Harley, Nat Genet                  |
| rs12047808  | 1 | 177.736 | C1orf125     | NA   | NA   | NA       | NA  | NA               | NA    | NA    | MS (age of onset) | Baranzini, Hum Mol Genet           |
| rs2022013   | 1 | 181.620 | NMNAT2       | 0.34 | 0.42 | 2.19E-02 | add | 0.72 [0.55-0.95] | 0.839 | 0.915 | SLE               | Harley, Nat Genet 40, 2008         |
| rs10801047* | 1 | 189.826 | Intergenic   | 0.05 | 0.08 | 1.54E-01 | add | 0.65 [0.36-1.17] | 1.000 | 0.538 | CD                | Parkes, Nat Genet                  |
| rs2760524   | 1 | 190.797 | RSG1         | NA   | NA   | NA       | NA  | NA               | NA    | NA    | MS                | De Jager, Nat Genet 2009           |
| rs2816316   | 1 | 190.803 | RGS1         | 0.17 | 0.17 | 9.28E-01 | add | 0.98 [0.69-1.4]  | 0.734 | 0.060 | CelID             | Hunt, Nat Genet                    |
| rs7554511   | 1 | 199.144 | C1orf106     | NA   | NA   | NA       | NA  | NA               | NA    | NA    | UC                | Barrett Nat Genet 2009             |
| rs11584383* | 1 | 199.202 | Intergenic   | 0.36 | 0.29 | 3.36E-02 | add | 1.35 [1.02-1.78] | 0.690 | 0.646 | CD                | Barrett, Nat Genet                 |
| rs3024505   | 1 | 205.007 | IL10         | NA   | NA   | NA       | NA  | NA               | NA    | NA    | T1D               | Barrett, Nat Genet                 |
| rs3024505   | 1 | 205.007 | IL10         | NA   | NA   | NA       | NA  | NA               | NA    | NA    | UC                | Franke, Nat Genet                  |
| rs3024493   | 1 | 205.011 | IL10         | NA   | NA   | NA       | NA  | NA               | NA    | NA    | UC                | Barrett Nat Genet 2009             |
| rs2639703*  | 1 | 223.880 | ENAH         | 0.34 | 0.27 | 3.32E-02 | add | 1.35 [1.02-1.79] | 0.219 | 0.726 | T1D               | WTCCC, Nature 447, 2007            |
| rs1109670   | 2 | 9.167   | DDEF2        | NA   | NA   | NA       | NA  | NA               | NA    | NA    | MS                | Baranzini, Hum Mol Genet           |

|             |   |         |               |      |      |          |     |                  |       |       |                   |                                    |
|-------------|---|---------|---------------|------|------|----------|-----|------------------|-------|-------|-------------------|------------------------------------|
| rs1534422   | 2 | 12.558  | Intergenic    | 0.42 | 0.45 | 3.15E-01 | add | 0.87 [0.67-1.14] | 0.705 | 0.625 | T1D               | Barrett, Nat Genet                 |
| rs2165738   | 2 | 24.546  | Intergenic    | NA   | NA   | NA       | NA  | NA               | NA    | NA    | T1D               | Cooper, Nat Genet                  |
| rs13385731  | 2 | 33.555  | RASGRP3       | NA   | NA   | NA       | NA  | NA               | NA    | NA    | SLE               | Han Nat Genet 2009                 |
| rs6544997   | 2 | 47.698  | KCNK12        | 0.51 | 0.48 | 5.65E-01 | add | 1.08 [0.83-1.41] | 0.140 | 0.890 | Vitiligo          | Birlea J Invest Dermatol 2009      |
| rs17039212  | 2 | 49.809  | Intergenic    | NA   | NA   | NA       | NA  | NA               | NA    | NA    | SLE               | Graham, Nat Genet                  |
| rs13031237* | 2 | 60.990  | REL           | 0.27 | 0.34 | 2.35E-02 | add | 0.71 [0.53-0.96] | 0.816 | 0.107 | RA                | Gregersen, Nat Genet               |
| rs13017599  | 2 | 61.018  | REL           | 0.27 | 0.34 | 2.35E-02 | add | 0.71 [0.53-0.96] | 0.816 | 0.107 | RA                | Gregersen, Nat Genet               |
| rs2164807   | 2 | 85.816  | RNF181, VAMP8 | 0.39 | 0.43 | 4.21E-01 | add | 0.89 [0.68-1.17] | 0.561 | 0.547 | PS                | Liu et al, PLoS Genetics 4, 2008   |
| rs9653442   | 2 | 100.192 | intergenic    | NA   | NA   | NA       | NA  | NA               | NA    | NA    | T1D               | Todd, Nat Genet                    |
| rs13015714* | 2 | 102.338 | several       | 0.25 | 0.23 | 5.84E-01 | add | 1.09 [0.8-1.47]  | 0.213 | 0.662 | CelD              | Hunt, Nat Genet                    |
| rs651477    | 2 | 119.112 | Intergenic    | NA   | NA   | NA       | NA  | NA               | NA    | NA    | MS                | Baranzini, Hum Mol Genet           |
| rs1437898   | 2 | 133.463 | NAP5          | 0.37 | 0.37 | 9.63E-01 | add | 1.01 [0.77-1.32] | 0.163 | 0.740 | MS (age of onset) | Baranzini, Hum Mol Genet           |
| rs882300    | 2 | 136.693 | MCM6, CXCR4   | NA   | NA   | NA       | NA  | NA               | NA    | NA    | MS                | De Jager, Nat Genet 2009           |
| rs1990760*  | 2 | 162.832 | IFIH1         | 0.41 | 0.41 | 8.14E-01 | add | 1.03 [0.79-1.35] | 0.849 | 0.199 | T1D               | Barrett, Nat Genet                 |
| rs1990760*  | 2 | 162.832 | IFIH1         | 0.41 | 0.41 | 8.14E-01 | add | 1.03 [0.79-1.35] | 0.849 | 0.199 | T1D               | Todd, Nat Genet                    |
| rs3821236   | 2 | 191.611 | STAT4         | NA   | NA   | NA       | NA  | NA               | NA    | NA    | SLE               | Graham, Nat Genet                  |
| rs7574865   | 2 | 191.673 | STAT4         | 0.23 | 0.24 | 7.31E-01 | add | 0.95 [0.69-1.29] | 0.428 | 0.191 | SLE               | Han Nat Genet 2009                 |
| rs7574865   | 2 | 191.673 | STAT4         | 0.23 | 0.24 | 7.31E-01 | add | 0.95 [0.69-1.29] | 0.428 | 0.191 | SLE               | Hom, N Engl J Med                  |
| rs231735    | 2 | 204.402 | CTLA4         | 0.48 | 0.49 | 9.95E-01 | add | 1 [0.77-1.3]     | 0.713 | 0.836 | RA                | Gregersen, Nat Genet               |
| rs3087243*  | 2 | 204.447 | CTLA4         | 0.42 | 0.43 | 8.08E-01 | add | 0.97 [0.74-1.27] | 0.849 | 0.460 | T1D               | Barrett, Nat Genet                 |
| rs3087243*  | 2 | 204.447 | CTLA4         | 0.42 | 0.43 | 8.08E-01 | add | 0.97 [0.74-1.27] | 0.849 | 0.460 | T1D               | Cooper, Nat Genet                  |
| rs12612347* | 2 | 218.766 | ARPC2         | 0.53 | 0.49 | 2.17E-01 | add | 1.18 [0.91-1.52] | 0.198 | 0.189 | UC                | Franke et al, Nat Genet 40, 2008   |
| rs10210302  | 2 | 233.824 | ATG16L1       | NA   | NA   | NA       | NA  | NA               | NA    | NA    | CD                | WTCCC, Nature 447, 2007            |
| rs3828309   | 2 | 233.845 | ATG16L1       | NA   | NA   | NA       | NA  | NA               | NA    | NA    | CD                | Barrett, Nat Genet                 |
| rs2241880   | 2 | 233.848 | ATG16L1       | NA   | NA   | NA       | NA  | NA               | NA    | NA    | CD                | Rioux, Nat Genet                   |
| rs6441961   | 3 | 46.327  | CCR1, CCR3    | 0.29 | 0.32 | 3.57E-01 | add | 0.87 [0.66-1.16] | 0.372 | 0.812 | CelD              | Hunt, Nat Genet                    |
| rs9858542*  | 3 | 49.677  | BSN           | 0.23 | 0.30 | 1.91E-02 | dom | 0.63 [0.43-0.93] | 0.068 | 0.033 | CD                | Parkes, Nat Genet                  |
| rs9858542*  | 3 | 49.677  | BSN           | 0.23 | 0.30 | 1.91E-02 | dom | 0.63 [0.43-0.93] | 0.068 | 0.033 | CD                | WTCCC, Nature 447, 2007            |
| rs9858542*  | 3 | 49.677  | BSN           | 0.23 | 0.30 | 1.91E-02 | dom | 0.63 [0.43-0.93] | 0.068 | 0.033 | UC                | Barrett Nat Genet 2009             |
| rs3197999   | 3 | 49.697  | MST1          | 0.23 | 0.30 | 1.91E-02 | dom | 0.63 [0.43-0.93] | 0.068 | 0.033 | CD                | Barrett, Nat Genet                 |
| rs6445975   | 3 | 58.345  | PXK           | 0.25 | 0.28 | 2.69E-01 | add | 0.84 [0.62-1.14] | 0.330 | 0.279 | SLE in women      | Harley, Nat Genet                  |
| rs6439924   | 3 | 141.652 | CLSTN2        | 0.23 | 0.18 | 1.78E-02 | add | 1.46 [1.07-1.99] | 1.000 | 1.000 | CD                | Rioux et al, Nat Genet 39, 2007    |
| rs908821    | 3 | 142.023 | SLC25A36      | 0.23 | 0.27 | 1.32E-01 | add | 0.79 [0.57-1.08] | 0.611 | 0.569 | MS                | Baranzini, Hum Mol Genet           |
| rs1841770   | 3 | 149.239 | ZIC1          | NA   | NA   | NA       | NA  | NA               | NA    | NA    | MS                | Baranzini, Hum Mol Genet           |
| rs12638253  | 3 | 158.109 | FLJ16641      | 0.42 | 0.47 | 8.04E-02 | add | 0.79 [0.6-1.03]  | 0.340 | 0.755 | MS (severity)     | Baranzini, Hum Mol Genet           |
| rs17810546  | 3 | 161.148 | IL12A, SCHIP1 | 0.10 | 0.10 | 7.32E-01 | add | 0.93 [0.61-1.42] | 1.000 | 0.092 | CelD              | Hunt, Nat Genet                    |
| rs4680534   | 3 | 161.182 | IL12A         | NA   | NA   | NA       | NA  | NA               | NA    | NA    | MS                | De Jager, Nat Genet 2009           |
| rs9834548   | 3 | 166.623 | Intergenic    | NA   | NA   | NA       | NA  | NA               | NA    | NA    | Kawasaki          | Burgner et al, Plos Genet 5, 2009  |
| rs17531088* | 3 | 176.376 | NAALADL2      | 0.43 | 0.46 | 3.16E-01 | add | 0.87 [0.67-1.14] | 0.342 | 0.404 | Kawasaki          | Burgner, PLoS Genet                |
| rs6762743   | 3 | 180.495 | ZNF639        | 0.28 | 0.30 | 7.00E-01 | add | 0.94 [0.7-1.27]  | 0.162 | 0.680 | CelD              | van Heel et al, Nat Genet 39, 2007 |
| rs9290678   | 3 | 180.500 | ZNF639        | 0.28 | 0.30 | 7.20E-01 | add | 0.95 [0.71-1.27] | 0.162 | 0.680 | CelD              | van Heel et al, Nat Genet 39, 2007 |

|             |   |         |            |      |      |          |     |                  |       |       |                  |                                    |
|-------------|---|---------|------------|------|------|----------|-----|------------------|-------|-------|------------------|------------------------------------|
| rs1464510   | 3 | 189.595 | LPP        | 0.48 | 0.43 | 1.29E-01 | add | 1.22 [0.94-1.59] | 0.578 | 0.070 | CelD             | Hunt, Nat Genet                    |
| rs3816587   | 4 | 25.026  | ANAPC4     | NA   | NA   | NA       | NA  | NA               | NA    | NA    | RA               | WTCCC, Nature 447, 2007            |
| rs10517086  | 4 | 25.695  | SLC34A2    | 0.32 | 0.30 | 5.39E-01 | add | 1.09 [0.82-1.45] | 0.669 | 0.161 | T1D              | Barrett, Nat Genet                 |
| rs16853571  | 4 | 41.448  | PHOX2B     | NA   | NA   | NA       | NA  | NA               | NA    | NA    | CD               | Rioux et al, Nat Genet 39, 2007    |
| rs10518025  | 4 | 67.747  | CENPC1     | 0.13 | 0.14 | 4.90E-01 | add | 0.87 [0.58-1.29] | 0.689 | 0.217 | MS<br>(severity) | Baranzini, Hum Mol Genet           |
| rs10516487  | 4 | 102.970 | BANK1      | 0.27 | 0.31 | 2.10E-01 | add | 0.83 [0.62-1.11] | 0.816 | 0.631 | SLE              | Kozyrev, Nat Genet                 |
| rs13151961  | 4 | 123.335 | KIAA1109   | NA   | NA   | NA       | NA  | NA               | NA    | NA    | CelD             | van Heel et al, Nat Genet 39, 2007 |
| rs4505848   | 4 | 123.352 | KIAA1109   | 0.33 | 0.31 | 7.61E-01 | add | 1.04 [0.79-1.38] | 0.529 | 0.968 | T1D              | Barrett, Nat Genet                 |
| rs6534347   | 4 | 123.418 | KIAA1109   | NA   | NA   | NA       | NA  | NA               | NA    | NA    | T1D              | WTCCC, Nature 447, 2007            |
| rs13119723  | 4 | 123.438 | KIAA1109   | NA   | NA   | NA       | NA  | NA               | NA    | NA    | CelD             | van Heel et al, Nat Genet 39, 2007 |
| rs17388568* | 4 | 123.549 | ADAD1      | 0.33 | 0.31 | 6.31E-01 | add | 1.07 [0.81-1.42] | 0.402 | 0.597 | T1D              | WTCCC, Nature 447, 2007            |
| rs12642902  | 4 | 123.728 | FGF2       | 0.38 | 0.34 | 1.97E-01 | add | 1.19 [0.91-1.56] | 0.244 | 0.939 | CelD             | van Heel et al, Nat Genet 39, 2007 |
| rs6822844   | 4 | 123.729 | FGF2       | NA   | NA   | NA       | NA  | NA               | NA    | NA    | CelD             | Hunt, Nat Genet                    |
| rs6822844   | 4 | 123.729 | FGF2       | NA   | NA   | NA       | NA  | NA               | NA    | NA    | CelD             | van Heel, Nat Genet                |
| rs1478091   | 4 | 132.010 | intergenic | 0.06 | 0.07 | 9.40E-01 | add | 0.98 [0.57-1.68] | 1.000 | 0.109 | MS<br>(severity) | Baranzini, Hum Mol Genet           |
| rs2313132*  | 4 | 138.912 | intergenic | 0.14 | 0.10 | 2.53E-02 | add | 1.55 [1.06-2.27] | 1.000 | 0.689 | SLE              | Graham, Nat Genet                  |
| rs7672826   | 4 | 182.637 | MGC45800   | 0.34 | 0.33 | 7.17E-01 | add | 1.05 [0.8-1.39]  | 0.532 | 0.844 | MS               | Baranzini, Hum Mol Genet           |
| rs6897932   | 5 | 35.910  | IL7R       | 0.21 | 0.25 | 4.42E-02 | dom | 0.67 [0.46-0.99] | 0.258 | 0.891 | MS               | De Jager, Nat Genet 2009           |
| rs6897932   | 5 | 35.910  | IL7R       | 0.21 | 0.25 | 4.42E-02 | dom | 0.67 [0.46-0.99] | 0.258 | 0.891 | MS               | Hafler, N Engl J Med               |
| rs6897932   | 5 | 35.910  | IL7R       | 0.21 | 0.25 | 4.42E-02 | dom | 0.67 [0.46-0.99] | 0.258 | 0.891 | T1D              | Todd, Nat Genet                    |
| rs1445898   | 5 | 35.946  | CAPSL      | NA   | NA   | NA       | NA  | NA               | NA    | NA    | T1D              | Todd, Nat Genet                    |
| rs348601    | 5 | 40.356  | Intergenic | NA   | NA   | NA       | NA  | NA               | NA    | NA    | CD               | Libioule et al, 2007               |
| rs1002922*  | 5 | 40.422  | Intergenic | 0.28 | 0.32 | 1.98E-01 | add | 0.83 [0.62-1.11] | 0.650 | 0.812 | CD               | Libioule et al, 2007               |
| rs4613763   | 5 | 40.428  | Intergenic | 0.17 | 0.11 | 1.07E-02 | add | 1.59 [1.11-2.27] | 1.000 | 0.727 | CD               | Libioule et al, 2007               |
| rs4613763   | 5 | 40.428  | Intergenic | 0.17 | 0.11 | 1.07E-02 | add | 1.59 [1.11-2.27] | 1.000 | 0.727 | CD               | Barrett, Nat Genet                 |
| rs10512734  | 5 | 40.429  | Intergenic | 0.28 | 0.32 | 1.98E-01 | add | 0.83 [0.62-1.11] | 0.650 | 0.812 | CD               | Libioule et al, 2007               |
| rs17234657* | 5 | 40.437  | Intergenic | 0.17 | 0.11 | 1.07E-02 | add | 1.59 [1.11-2.27] | 1.000 | 0.727 | CD               | WTCCC, Nature 447, 2007            |
| rs1992660*  | 5 | 40.451  | Intergenic | 0.38 | 0.40 | 4.78E-01 | add | 0.91 [0.69-1.19] | 0.431 | 0.264 | IBS              | Franke, PLoS ONE                   |
| rs6896969   | 5 | 40.460  | Intergenic | NA   | NA   | NA       | NA  | NA               | NA    | NA    | MS               | De Jager, Nat Genet 2009           |
| rs1373692   | 5 | 40.467  | Intergenic | 0.38 | 0.40 | 4.78E-01 | add | 0.91 [0.69-1.19] | 0.431 | 0.264 | CD               | Libioule, PLoS Genet               |
| rs9292777   | 5 | 40.474  | Intergenic | NA   | NA   | NA       | NA  | NA               | NA    | NA    | CD               | Parkes, Nat Genet                  |
| rs4495224   | 5 | 40.513  | Intergenic | NA   | NA   | NA       | NA  | NA               | NA    | NA    | CD               | Libioule et al, 2007               |
| rs979233*   | 5 | 42.411  | GHR        | 0.31 | 0.34 | 5.59E-01 | add | 0.92 [0.69-1.22] | 0.197 | 0.463 | SLE              | Hom, N Engl J Med                  |
| rs2544677*  | 5 | 86.435  | Intergenic | 0.24 | 0.23 | 8.36E-01 | add | 1.03 [0.76-1.4]  | 0.303 | 0.134 | T1D              | WTCCC, Nature 447, 2007            |
| rs6596075*  | 5 | 131.770 | Intergenic | 0.18 | 0.16 | 4.13E-01 | add | 1.15 [0.82-1.63] | 0.358 | 0.847 | CD               | WTCCC, Nature 447, 2007            |
| rs2188962*  | 5 | 131.799 | LOC441108  | 0.41 | 0.44 | 4.97E-01 | add | 0.91 [0.7-1.19]  | 0.849 | 0.400 | CD               | Barrett, Nat Genet                 |
| rs20541     | 5 | 132.024 | IL13       | 0.15 | 0.19 | 6.81E-02 | dom | 0.67 [0.44-1.03] | 0.134 | 1.000 | PS               | Nair, Nat Genet                    |
| rs17166496  | 5 | 132.657 | FSTL4      | NA   | NA   | NA       | NA  | NA               | NA    | NA    | T1D              | WTCCC, Nature 447, 2007            |
| rs13361189  | 5 | 150.204 | IRGM       | NA   | NA   | NA       | NA  | NA               | NA    | NA    | CD               | Parkes, Nat Genet                  |
| rs1000113   | 5 | 150.220 | IRGM       | NA   | NA   | NA       | NA  | NA               | NA    | NA    | CD               | WTCCC, Nature 447, 2007            |
| rs11747270  | 5 | 150.239 | IRGM       | NA   | NA   | NA       | NA  | NA               | NA    | NA    | CD               | Barrett, Nat Genet                 |

|             |   |         |             |      |      |          |     |                  |       |       |                   |                                  |
|-------------|---|---------|-------------|------|------|----------|-----|------------------|-------|-------|-------------------|----------------------------------|
| rs10036748  | 5 | 150.438 | TNIP1       | NA   | NA   | NA       | NA  | NA               | NA    | NA    | SLE               | Han Nat Genet 2009               |
| rs17728338  | 5 | 150.459 | TNIP1       | NA   | NA   | NA       | NA  | NA               | NA    | NA    | PS                | Nair, Nat Genet                  |
| rs4704970   | 5 | 155.434 | SGCD        | 0.19 | 0.18 | 9.37E-01 | add | 0.99 [0.7-1.38]  | 0.760 | 0.817 | MS (age of onset) | Baranzini, Hum Mol Genet         |
| rs2082412*  | 5 | 158.650 | IL12B       | 0.22 | 0.21 | 7.17E-01 | add | 1.06 [0.77-1.46] | 0.783 | 0.875 | PS                | Nair, Nat Genet                  |
| rs3213094   | 5 | 158.683 | IL12B       | NA   | NA   | NA       | NA  | NA               | NA    | NA    | PS                | Zhang, Nat Genet                 |
| rs10045431  | 5 | 158.747 | IL12B       | NA   | NA   | NA       | NA  | NA               | NA    | NA    | CD                | Barrett, Nat Genet               |
| rs6887695   | 5 | 158.755 | IL12B       | NA   | NA   | NA       | NA  | NA               | NA    | NA    | CD                | Parkes, Nat Genet                |
| rs6887695   | 5 | 158.755 | IL212B      | NA   | NA   | NA       | NA  | NA               | NA    | NA    | PsA               | Liu et al, PLoS Genetics 4, 2008 |
| rs2431697   | 5 | 159.813 | intergenic  | 0.45 | 0.44 | 7.36E-01 | add | 1.05 [0.8-1.36]  | 1.000 | 0.441 | SLE               | Harley, Nat Genet 40, 2008       |
| rs6941421   | 6 | 15.197  | JARID2      | NA   | NA   | NA       | NA  | NA               | NA    | NA    | MS (severity)     | Baranzini, Hum Mol Genet         |
| rs6908425   | 6 | 20.837  | CDKAL1      | NA   | NA   | NA       | NA  | NA               | NA    | NA    | CD                | Barrett, Nat Genet               |
| rs6908425   | 6 | 20.837  | CDKAL1      | NA   | NA   | NA       | NA  | NA               | NA    | NA    | CD                | WTCCC, Nature 447, 2007          |
| rs9263739*  | 6 | 31.219  | CCHCR1      | 0.19 | 0.17 | 4.02E-01 | add | 1.16 [0.82-1.62] | 0.760 | 0.804 | UC                | Asano Nat Genet 2009             |
| rs9268480*  | 6 | 32.472  | BTNL2       | 0.33 | 0.36 | 3.92E-01 | add | 0.89 [0.67-1.17] | 0.091 | 0.624 | UC                | Asano Nat Genet 2009             |
| rs9268877   | 6 | 32.539  | HLA         | NA   | NA   | NA       | NA  | NA               | NA    | NA    | UC                | Barrett Nat Genet 2009           |
| rs2395185   | 6 | 32.541  | HLA         | NA   | NA   | NA       | NA  | NA               | NA    | NA    | UC                | Asano Nat Genet 2009             |
| rs9271100   | 6 | 32.684  | HLA         | NA   | NA   | NA       | NA  | NA               | NA    | NA    | SLE               | Han Nat Genet 2009               |
| rs3757247   | 6 | 91.014  | BACH2       | 0.49 | 0.46 | 3.79E-01 | add | 1.13 [0.87-1.46] | 0.853 | 0.945 | T1D               | Grant, Diabetes                  |
| rs11755527* | 6 | 91.015  | BACH2       | 0.49 | 0.46 | 3.79E-01 | add | 1.13 [0.87-1.46] | 0.853 | 0.945 | T1D               | Barrett, Nat Genet               |
| rs11755527* | 6 | 91.015  | BACH2       | 0.49 | 0.46 | 3.79E-01 | add | 1.13 [0.87-1.46] | 0.853 | 0.945 | T1D               | Cooper, Nat Genet                |
| rs7746082   | 6 | 106.542 | PRDM1, ATG5 | NA   | NA   | NA       | NA  | NA               | NA    | NA    | CD                | Barrett, Nat Genet               |
| rs548234    | 6 | 106.675 | PRDM1, ATG5 | NA   | NA   | NA       | NA  | NA               | NA    | NA    | SLE               | Han Nat Genet 2009               |
| rs6568431   | 6 | 106.695 | PRDM1, ATG5 | NA   | NA   | NA       | NA  | NA               | NA    | NA    | SLE               | Harley, Nat Genet 40, 2008       |
| rs573775    | 6 | 106.872 | ATG5        | NA   | NA   | NA       | NA  | NA               | NA    | NA    | SLE               | Harley, Nat Genet 40, 2008       |
| rs9388489*  | 6 | 126.740 | C6orf173    | 0.50 | 0.48 | 6.89E-01 | add | 1.05 [0.81-1.37] | 0.457 | 0.350 | T1D               | Barrett, Nat Genet               |
| rs10499194  | 6 | 138.044 | TNFAIP3     | NA   | NA   | NA       | NA  | NA               | NA    | NA    | RA                | Plenge, Nat Genet                |
| rs6920220*  | 6 | 138.048 | TNFAIP3     | 0.18 | 0.20 | 5.27E-01 | add | 0.89 [0.63-1.26] | 0.761 | 0.956 | RA                | Plenge, Nat Genet                |
| rs6920220*  | 6 | 138.048 | TNFAIP3     | 0.18 | 0.20 | 5.27E-01 | add | 0.89 [0.63-1.26] | 0.761 | 0.956 | RA                | Raychaudhuri, Nat Genet          |
| rs6920220*  | 6 | 138.048 | TNFAIP3     | 0.18 | 0.20 | 5.27E-01 | add | 0.89 [0.63-1.26] | 0.761 | 0.956 | RA                | WTCCC, Nature 447, 2007          |
| rs7753394   | 6 | 138.127 | TNFAIP3     | NA   | NA   | NA       | NA  | NA               | NA    | NA    | CD                | WTCCC, Nature 447, 2007          |
| rs5029939   | 6 | 138.237 | TNFAIP3     | NA   | NA   | NA       | NA  | NA               | NA    | NA    | SLE               | Graham, Nat Genet                |
| rs2230926   | 6 | 138.238 | TNFAIP3     | NA   | NA   | NA       | NA  | NA               | NA    | NA    | SLE               | Han Nat Genet 2009               |
| rs610604    | 6 | 138.241 | TNFAIP3     | NA   | NA   | NA       | NA  | NA               | NA    | NA    | PS                | Nair, Nat Genet                  |
| rs1738074   | 6 | 159.386 | TAGAP       | NA   | NA   | NA       | NA  | NA               | NA    | NA    | CelD              | Hunt, Nat Genet                  |
| rs2301436   | 6 | 167.358 | FGFR10P     | 0.46 | 0.46 | 2.11E-01 | dom | 0.78 [0.53-1.15] | 0.024 | 0.164 | CD                | Barrett, Nat Genet               |
| rs13208776  | 6 | 168.684 | SMOC2       | NA   | NA   | NA       | NA  | NA               | NA    | NA    | Vitiligo          | Birlea J Invest Dermatol 2009    |
| rs10259085  | 7 | 7.235   | C1GALT1     | NA   | NA   | NA       | NA  | NA               | NA    | NA    | MS (severity)     | Baranzini, Hum Mol Genet         |
| rs11771231  | 7 | 7.781   | RPA3        | NA   | NA   | NA       | NA  | NA               | NA    | NA    | RA                | WTCCC, Nature 447, 2007          |
| rs10156091  | 7 | 8.154   | ICA1        | 0.12 | 0.09 | 1.89E-01 | add | 1.3 [0.88-1.94]  | 0.667 | 0.062 | SLE               | Harley, Nat Genet 40, 2008       |
| rs7804356   | 7 | 26.858  | SKAP2       | 0.22 | 0.24 | 5.37E-01 | add | 0.91 [0.66-1.24] | 1.000 | 0.397 | T1D               | Barrett, Nat Genet               |
| rs317711    | 7 | 29.069  | CPVL        | NA   | NA   | NA       | NA  | NA               | NA    | NA    | BD                | Fei, Arthritis Res Ther          |

|             |   |         |             |      |      |          |     |                  |       |       |                   |                                    |
|-------------|---|---------|-------------|------|------|----------|-----|------------------|-------|-------|-------------------|------------------------------------|
| rs1456893*  | 7 | 50.240  | Intergenic  | 0.29 | 0.31 | 5.21E-01 | add | 0.91 [0.68-1.21] | 0.656 | 0.746 | CD                | Barrett, Nat Genet                 |
| rs4917014   | 7 | 50.276  | IKZF1       | NA   | NA   | NA       | NA  | NA               | NA    | NA    | SLE               | Han Nat Genet 2009                 |
| rs4948088   | 7 | 50.995  | COBL        | NA   | NA   | NA       | NA  | NA               | NA    | NA    | T1D               | Barrett, Nat Genet                 |
| rs1167796   | 7 | 75.011  | HIP1        | NA   | NA   | NA       | NA  | NA               | NA    | NA    | SLE               | Han Nat Genet 2009                 |
| rs42041*    | 7 | 92.085  | CDK6        | 0.27 | 0.29 | 6.46E-01 | add | 0.93 [0.69-1.25] | 0.157 | 0.704 | RA                | Raychaudhuri, Nat Genet            |
| rs10255021  | 7 | 93.870  | COL1A2      | NA   | NA   | NA       | NA  | NA               | NA    | NA    | T1D               | Hakonarson et al, Nature 448, 2007 |
| rs17157903  | 7 | 103.415 | RELN        | NA   | NA   | NA       | NA  | NA               | NA    | NA    | MS (age of onset) | Baranzini, Hum Mol Genet           |
| rs2108225*  | 7 | 107.240 | SLC26A3     | 0.44 | 0.43 | 7.61E-01 | add | 1.04 [0.8-1.36]  | 1.000 | 0.052 | UC                | Asano Nat Genet 2009               |
| rs4730273   | 7 | 107.267 | SLC26A4     | 0.28 | 0.30 | 6.35E-01 | add | 0.93 [0.7-1.25]  | 0.820 | 0.934 | UC                | Silverberg, Nat Genet              |
| rs4730276   | 7 | 107.272 | SLC26A4     | NA   | NA   | NA       | NA  | NA               | NA    | NA    | UC                | Silverberg, Nat Genet              |
| rs886774*   | 7 | 107.283 | SLC26A4     | 0.43 | 0.41 | 4.80E-01 | add | 1.1 [0.84-1.44]  | 0.704 | 0.694 | UC                | Barrett Nat Genet 2009             |
| rs4598195   | 7 | 107.291 | SLC26A4     | 0.40 | 0.42 | 3.87E-01 | add | 0.89 [0.68-1.16] | 0.442 | 0.357 | UC                | Silverberg, Nat Genet              |
| rs2158836   | 7 | 107.368 | LAMB1       | 0.42 | 0.38 | 2.67E-01 | add | 1.16 [0.89-1.52] | 0.340 | 0.912 | UC                | Silverberg, Nat Genet              |
| rs10243024  | 7 | 116.134 | MET         | 0.25 | 0.24 | 7.42E-01 | add | 1.05 [0.78-1.42] | 0.326 | 0.814 | MS (severity)     | Baranzini, Hum Mol Genet           |
| rs729302    | 7 | 128.356 | IRF5, TNPO3 | 0.24 | 0.31 | 6.95E-03 | dom | 0.59 [0.41-0.87] | 0.203 | 0.903 | SLE               | Harley, Nat Genet 40, 2008         |
| rs4728142   | 7 | 128.361 | IRF5, TNPO3 | NA   | NA   | NA       | NA  | NA               | NA    | NA    | SLE               | Han Nat Genet 2009                 |
| rs10488631  | 7 | 128.381 | IRF5, TNPO3 | NA   | NA   | NA       | NA  | NA               | NA    | NA    | SLE               | Hom, N Engl J Med                  |
| rs10239340  | 7 | 128.456 | IRF5, TNPO3 | 0.28 | 0.37 | 2.40E-03 | add | 0.64 [0.48-0.85] | 0.489 | 0.319 | SLE               | Harley, Nat Genet 40, 2008         |
| rs10279821* | 7 | 128.471 | IRF5, TNPO3 | 0.28 | 0.37 | 2.40E-03 | add | 0.64 [0.48-0.85] | 0.489 | 0.319 | SLE               | Harley, Nat Genet 40, 2008         |
| rs12537284  | 7 | 128.505 | IRF5, TNPO3 | 0.18 | 0.13 | 3.24E-02 | add | 1.45 [1.03-2.05] | 1.000 | 0.821 | SLE in women      | Harley, Nat Genet                  |
| rs11761231  | 7 | 131.021 | Intergenic  | NA   | NA   | NA       | NA  | NA               | NA    | NA    | RA                | WTCCC, Nature 447, 2007            |
| rs7807268   | 7 | 147.889 | Intergenic  | NA   | NA   | NA       | NA  | NA               | NA    | NA    | CD                | WTCCC, Nature 447, 2007            |
| rs1529316   | 8 | 3.816   | CSMD1       | NA   | NA   | NA       | NA  | NA               | NA    | NA    | MS                | Baranzini, Hum Mol Genet           |
| rs6601327   | 8 | 9.433   | Intergenic  | 0.37 | 0.35 | 6.64E-01 | add | 1.06 [0.81-1.39] | 0.229 | 0.733 | SLE               | Harley, Nat Genet 40, 2008         |
| rs6985109   | 8 | 10.799  | XKR6        | NA   | NA   | NA       | NA  | NA               | NA    | NA    | SLE               | Harley, Nat Genet 40, 2008         |
| rs4240671   | 8 | 10.805  | XKR6        | 0.49 | 0.50 | 7.38E-01 | add | 0.96 [0.74-1.24] | 0.854 | 0.756 | SLE               | Harley, Nat Genet 40, 2008         |
| rs11783247  | 8 | 10.826  | XKR6        | NA   | NA   | NA       | NA  | NA               | NA    | NA    | SLE               | Harley, Nat Genet 40, 2008         |
| rs6984496   | 8 | 10.834  | XKR6        | NA   | NA   | NA       | NA  | NA               | NA    | NA    | SLE               | Harley, Nat Genet 40, 2008         |
| rs7836059   | 8 | 11.310  | C8orf12     | 0.48 | 0.50 | 4.14E-01 | add | 0.89 [0.68-1.17] | 0.851 | 0.835 | SLE               | Harley, Nat Genet 40, 2008         |
| rs7812879*  | 8 | 11.378  | BLK         | 0.16 | 0.18 | 3.33E-01 | add | 0.84 [0.58-1.2]  | 0.735 | 0.454 | SLE               | Han Nat Genet 2009                 |
| rs2736340   | 8 | 11.381  | BLK         | 0.26 | 0.23 | 3.46E-01 | add | 1.15 [0.86-1.56] | 0.634 | 0.961 | RA                | Gregersen, Nat Genet               |
| rs13277113* | 8 | 11.387  | BLK         | 0.26 | 0.23 | 3.46E-01 | add | 1.15 [0.86-1.56] | 0.634 | 0.961 | SLE               | Hom, N Engl J Med                  |
| rs2618476   | 8 | 11.390  | BLK         | NA   | NA   | NA       | NA  | NA               | NA    | NA    | SLE               | Graham, Nat Genet                  |
| rs2248932   | 8 | 11.429  | BLK         | 0.37 | 0.33 | 2.63E-01 | add | 1.17 [0.89-1.54] | 0.844 | 0.697 | SLE               | Harley, Nat Genet 40, 2008         |
| rs10903340  | 8 | 11.488  | BLK         | NA   | NA   | NA       | NA  | NA               | NA    | NA    | SLE               | Harley, Nat Genet 40, 2008         |
| rs7829816   | 8 | 57.012  | LYN         | 0.23 | 0.21 | 3.86E-01 | add | 1.15 [0.84-1.57] | 0.792 | 0.959 | SLE               | Harley, Nat Genet 40, 2008         |
| rs2667978   | 8 | 57.061  | LYN         | 0.22 | 0.23 | 9.52E-01 | add | 1.01 [0.74-1.38] | 1.000 | 0.061 | SLE               | Harley, Nat Genet 40, 2008         |
| rs2116078*  | 8 | 73.527  | Intergenic  | 0.45 | 0.48 | 4.81E-01 | add | 0.91 [0.7-1.19]  | 0.352 | 0.628 | MS (age of onset) | Baranzini, Hum Mol Genet           |
| rs1551398   | 8 | 126.609 | Intergenic  | NA   | NA   | NA       | NA  | NA               | NA    | NA    | CD                | Barrett, Nat Genet                 |
| rs10505604  | 8 | 134.097 | TG          | 0.23 | 0.26 | 3.70E-01 | add | 0.87 [0.63-1.19] | 1.000 | 0.928 | CeID              | van Heel et al, Nat Genet 39, 2007 |

|             |    |         |              |      |      |          |     |                  |       |       |                   |                                    |
|-------------|----|---------|--------------|------|------|----------|-----|------------------|-------|-------|-------------------|------------------------------------|
| rs4469515   | 9  | 1.329   | Intergenic   | 0.43 | 0.40 | 2.92E-01 | add | 1.15 [0.89-1.5]  | 0.851 | 0.351 | CelD              | van Heel et al, Nat Genet 39, 2007 |
| rs7020673*  | 9  | 4.282   | GLIS3        | 0.44 | 0.49 | 1.53E-01 | add | 0.82 [0.63-1.07] | 0.348 | 0.511 | T1D               | Barrett, Nat Genet                 |
| rs10758593* | 9  | 4.282   | GLIS3        | 0.47 | 0.44 | 3.27E-01 | add | 1.14 [0.88-1.49] | 1.000 | 0.362 | T1D               | Grant, Diabetes                    |
| rs10758669  | 9  | 4.972   | JAK2         | 0.36 | 0.36 | 7.93E-01 | add | 1.04 [0.79-1.36] | 1.000 | 0.163 | CD                | Barrett, Nat Genet                 |
| rs10975003  | 9  | 5.204   | INSL4, INSL6 | NA   | NA   | NA       | NA  | NA               | NA    | NA    | UC                | Asano Nat Genet 2009               |
| rs1755289   | 9  | 17.928  | in           | NA   | NA   | NA       | NA  | NA               | NA    | NA    | MS                | Baranzini, Hum Mol Genet           |
| rs2812378*  | 9  | 34.700  | CCL21        | 0.28 | 0.29 | 6.98E-01 | add | 0.94 [0.71-1.26] | 0.489 | 0.046 | RA                | Raychaudhuri, Nat Genet            |
| rs2842483   | 9  | 78.096  | RFK          | 0.28 | 0.27 | 6.34E-01 | add | 1.07 [0.8-1.44]  | 0.489 | 1.000 | MS (age of onset) | Baranzini, Hum Mol Genet           |
| rs668853    | 9  | 84.501  | in           | NA   | NA   | NA       | NA  | NA               | NA    | NA    | UC                | Silverberg, Nat Genet              |
| rs2061634*  | 9  | 99.146  | KIAA1529     | 0.23 | 0.29 | 1.07E-01 | add | 0.77 [0.57-1.06] | 1.000 | 0.704 | BD                | Fei, Arthritis Res Ther            |
| rs4263839*  | 9  | 116.606 | TNFSF15      | 0.34 | 0.31 | 3.05E-01 | add | 1.15 [0.88-1.52] | 0.839 | 0.516 | CD                | Barrett, Nat Genet                 |
| rs6478109   | 9  | 116.609 | TNFSF15      | 0.34 | 0.31 | 3.05E-01 | add | 1.15 [0.88-1.52] | 0.839 | 0.516 | IBD               | Kugathasan, Nat Genet              |
| rs10984447  | 9  | 121.024 | DBC1         | NA   | NA   | NA       | NA  | NA               | NA    | NA    | MS                | Hafler, N Engl J Med               |
| rs881375    | 9  | 122.693 | TRAF1-C5     | NA   | NA   | NA       | NA  | NA               | NA    | NA    | RA                | Gregersen, Nat Genet               |
| rs3761847*  | 9  | 122.730 | TRAF1        | 0.38 | 0.40 | 3.40E-01 | add | 0.88 [0.67-1.15] | 0.552 | 0.429 | RA                | Plenge, N Engl J Med               |
| rs11243676  | 9  | 134.087 | NTNG2        | NA   | NA   | NA       | NA  | NA               | NA    | NA    | SLE               | Hom, N Engl J Med                  |
| rs1076160*  | 9  | 134.766 | TSC1         | 0.43 | 0.47 | 2.37E-01 | add | 0.85 [0.66-1.11] | 0.342 | 0.365 | PS                | Nair, Nat Genet                    |
| rs10781500* | 9  | 138.389 | CARD9        | 0.38 | 0.40 | 3.52E-01 | add | 0.88 [0.67-1.15] | 0.693 | 0.220 | UC                | Barrett Nat Genet 2009             |
| rs6601764   | 10 | 3.853   | KLF6         | NA   | NA   | NA       | NA  | NA               | NA    | NA    | CD                | WTCCC, Nature 447, 2007            |
| rs2104286   | 10 | 6.139   | IL2RA        | NA   | NA   | NA       | NA  | NA               | NA    | NA    | MS                | Bahlo, Nat Genet 2009              |
| rs2104286   | 10 | 6.139   | IL2RA        | NA   | NA   | NA       | NA  | NA               | NA    | NA    | MS                | De Jager, Nat Genet 2009           |
| rs2104286   | 10 | 6.139   | IL2RA        | NA   | NA   | NA       | NA  | NA               | NA    | NA    | MS                | Hafler, N Engl J Med 357, 2007     |
| rs2104286   | 10 | 6.139   | IL2RA        | NA   | NA   | NA       | NA  | NA               | NA    | NA    | RA                | WTCCC, Nature 447, 2007            |
| rs2104286   | 10 | 6.139   | IL2RA        | NA   | NA   | NA       | NA  | NA               | NA    | NA    | RA+T1D            | WTCCC, Nature 447, 2007            |
| rs2104286   | 10 | 6.139   | IL2RA        | NA   | NA   | NA       | NA  | NA               | NA    | NA    | T1D               | WTCCC, Nature 447, 2007            |
| rs12722489  | 10 | 6.142   | IL2RA        | NA   | NA   | NA       | NA  | NA               | NA    | NA    | MS                | Hafler, N Engl J Med               |
| rs12251307  | 10 | 6.164   | IL2RA        | NA   | NA   | NA       | NA  | NA               | NA    | NA    | T1D               | Barrett, Nat Genet                 |
| rs12251307  | 10 | 6.164   | IL2RA        | NA   | NA   | NA       | NA  | NA               | NA    | NA    | T1D               | Cooper, Nat Genet                  |
| rs1064891   | 10 | 6.317   | PFKFB3       | 0.46 | 0.42 | 2.61E-01 | add | 1.16 [0.89-1.52] | 0.135 | 0.215 | CelD              | van Heel et al, Nat Genet 39, 2007 |
| rs1539234*  | 10 | 6.317   | PFKFB3       | 0.46 | 0.42 | 2.61E-01 | add | 1.16 [0.89-1.52] | 0.135 | 0.215 | CelD              | van Heel et al, Nat Genet 39, 2007 |
| rs947474    | 10 | 6.430   | PRKCQ        | NA   | NA   | NA       | NA  | NA               | NA    | NA    | T1D               | Cooper, Nat Genet                  |
| rs4750316*  | 10 | 6.433   | PRKCQ        | 0.23 | 0.19 | 1.38E-01 | add | 1.27 [0.93-1.73] | 0.792 | 0.778 | RA                | Raychaudhuri, Nat Genet            |
| rs11258747* | 10 | 6.513   | PRKCQ        | 0.27 | 0.21 | 3.80E-02 | add | 1.37 [1.02-1.84] | 0.009 | 0.916 | T1D               | Barrett, Nat Genet                 |
| rs1398024   | 10 | 23.705  | C10orf67     | 0.22 | 0.24 | 7.71E-01 | add | 0.95 [0.7-1.3]   | 0.027 | 0.084 | CD+Sarc           | Franke, Gastroenterology           |
| rs17582416* | 10 | 35.328  | Intergenic   | 0.38 | 0.35 | 5.01E-02 | dom | 1.48 [1-2.19]    | 0.031 | 0.878 | CD                | Barrett, Nat Genet                 |
| rs11101442  | 10 | 49.606  | C10orf64     | NA   | NA   | NA       | NA  | NA               | NA    | NA    | SLE               | Graham, Nat Genet                  |
| rs1913517   | 10 | 49.789  | LRRC18       | 0.53 | 0.50 | 7.00E-01 | add | 1.05 [0.81-1.37] | 0.852 | 0.468 | SLE               | Han Nat Genet 2009                 |
| rs10995271  | 10 | 64.108  | ZNF365       | NA   | NA   | NA       | NA  | NA               | NA    | NA    | CD                | Barrett, Nat Genet                 |
| rs10761659  | 10 | 64.116  | ZNF365       | NA   | NA   | NA       | NA  | NA               | NA    | NA    | CD                | WTCCC, Nature 447, 2007            |
| rs224136    | 10 | 64.141  | Intergenic   | 0.14 | 0.15 | 6.10E-01 | add | 0.91 [0.62-1.32] | 0.226 | 0.256 | CD                | Rioux, Nat Genet                   |
| rs1250540   | 10 | 80.706  | ZMIZ1        | NA   | NA   | NA       | NA  | NA               | NA    | NA    | MS                | De Jager, Nat Genet 2009           |
| rs1250550   | 10 | 80.730  | ZMIZ1        | 0.32 | 0.32 | 9.00E-02 | dom | 0.72 [0.49-1.05] | 0.005 | 0.905 | IBD (early)       | Imielinski Nat Genet 2009          |

|             |    |         |              |      |      |          |     |                  |       |       |                   |                   |                                    |
|-------------|----|---------|--------------|------|------|----------|-----|------------------|-------|-------|-------------------|-------------------|------------------------------------|
| rs10509540  | 10 | 90.013  | RNLS         | NA   | NA   | NA       | NA  | NA               | NA    | NA    | NA                | T1D               | Barrett, Nat Genet                 |
| rs10883365* | 10 | 101.278 | NKX2-3       | 0.54 | 0.49 | 2.03E-01 | add | 1.19 [0.91-1.54] | 0.580 | 0.534 | CD                | CD                | Parkes, Nat Genet                  |
| rs10883365* | 10 | 101.278 | NKX2-3       | 0.54 | 0.49 | 2.03E-01 | add | 1.19 [0.91-1.54] | 0.580 | 0.534 | CD                | CD                | WTCCC, Nature 447, 2007            |
| rs6584283   | 10 | 101.280 | NKX2, NKX3   | NA   | NA   | NA       | NA  | NA               | NA    | NA    | UC                | UC                | Barrett Nat Genet 2009             |
| rs11190140  | 10 | 101.282 | NKX2-3       | 0.54 | 0.49 | 2.03E-01 | add | 1.19 [0.91-1.54] | 0.580 | 0.534 | CD                | CD                | Barrett, Nat Genet                 |
| rs4963128   | 11 | 0.580   | KIAA1542     | NA   | NA   | NA       | NA  | NA               | NA    | NA    | SLE in women      | SLE in women      | Harley, Nat Genet                  |
| rs3741208   | 11 | 2.126   | INS          | NA   | NA   | NA       | NA  | NA               | NA    | NA    | T1D               | T1D               | Todd, Nat Genet                    |
| rs1004446   | 11 | 2.127   | INS          | NA   | NA   | NA       | NA  | NA               | NA    | NA    | T1D               | T1D               | Hakonarson, Nature                 |
| rs6356      | 11 | 2.148   | INS          | 0.39 | 0.37 | 5.25E-01 | add | 1.09 [0.83-1.44] | 1.000 | 0.192 | T1D               | T1D               | Hakonarson et al, Nature 448, 2007 |
| rs10770141  | 11 | 2.150   | INS          | NA   | NA   | NA       | NA  | NA               | NA    | NA    | T1D               | T1D               | Hakonarson et al, Nature 448, 2007 |
| rs10743152  | 11 | 2.153   | INS          | NA   | NA   | NA       | NA  | NA               | NA    | NA    | T1D               | T1D               | Hakonarson et al, Nature 448, 2007 |
| rs7111341   | 11 | 2.170   | INS          | 0.31 | 0.25 | 4.76E-02 | add | 1.32 [1-1.75]    | 0.019 | 0.254 | T1D               | T1D               | Barrett, Nat Genet 2009            |
| rs7111341   | 11 | 2.170   | INS          | 0.31 | 0.25 | 4.76E-02 | add | 1.32 [1-1.75]    | 0.019 | 0.254 | T1D               | T1D               | Hakonarson et al, Nature 448, 2007 |
| rs1793004   | 11 | 20.656  | NELL1        | NA   | NA   | NA       | NA  | NA               | NA    | NA    | IBS               | IBS               | Franke, PLoS ONE                   |
| rs17824933  | 11 | 60.517  | CD6          | NA   | NA   | NA       | NA  | NA               | NA    | NA    | MS                | MS                | De Jager, Nat Genet 2009           |
| rs7927894   | 11 | 75.979  | Intergenic   | NA   | NA   | NA       | NA  | NA               | NA    | NA    | CD                | CD                | Barrett, Nat Genet                 |
| rs1386330   | 11 | 87.459  | Intergenic   | NA   | NA   | NA       | NA  | NA               | NA    | NA    | MS (age of onset) | MS (age of onset) | Baranzini, Hum Mol Genet           |
| rs180358*   | 11 | 116.105 | Intergenic   | 0.28 | 0.26 | 6.66E-01 | add | 1.07 [0.8-1.43]  | 1.000 | 0.167 | MS (severity)     | MS (severity)     | Baranzini, Hum Mol Genet           |
| rs4639966   | 11 | 118.079 | Intergenic   | NA   | NA   | NA       | NA  | NA               | NA    | NA    | SLE               | SLE               | Han Nat Genet 2009                 |
| rs6590330   | 11 | 127.816 | Intergenic   | 0.11 | 0.10 | 6.88E-01 | add | 1.09 [0.71-1.69] | 1.000 | 0.008 | SLE               | SLE               | Han Nat Genet 2009                 |
| rs886898    | 12 | 2.352   | CACNA1C      | NA   | NA   | NA       | NA  | NA               | NA    | NA    | CD                | CD                | Rioux et al, Nat Genet 39, 2007    |
| rs1800693   | 12 | 6.310   | TNFRSF1A     | 0.44 | 0.42 | 6.69E-01 | add | 1.06 [0.81-1.38] | 0.708 | 0.523 | MS                | MS                | De Jager, Nat Genet 2009           |
| rs4149584   | 12 | 6.313   | TNFRSF1A     | NA   | NA   | NA       | NA  | NA               | NA    | NA    | MS                | MS                | De Jager, Nat Genet 2009           |
| rs3764021   | 12 | 9.725   | CLEC2D       | 0.44 | 0.49 | 2.59E-01 | add | 0.86 [0.66-1.12] | 0.348 | 0.299 | T1D               | T1D               | WTCCC, Nature 447, 2007            |
| rs11052552  | 12 | 9.747   | KLRB1        | 0.46 | 0.50 | 3.48E-01 | add | 0.88 [0.68-1.15] | 0.354 | 0.253 | T1D               | T1D               | WTCCC, Nature 447, 2007            |
| rs4763879   | 12 | 9.801   | CD69         | NA   | NA   | NA       | NA  | NA               | NA    | NA    | T1D               | T1D               | Barrett, Nat Genet                 |
| rs11175593  | 12 | 38.888  | LRRK2, MUC19 | NA   | NA   | NA       | NA  | NA               | NA    | NA    | CD                | CD                | Barrett, Nat Genet                 |
| rs1458175   | 12 | 40.252  | PDZRN4       | NA   | NA   | NA       | NA  | NA               | NA    | NA    | MS                | MS                | Baranzini, Hum Mol Genet           |
| rs773107    | 12 | 54.656  | RAB5B        | 0.30 | 0.32 | 5.15E-01 | add | 0.91 [0.69-1.21] | 0.276 | 0.063 | T1D               | T1D               | Hakonarson, Diabetes 57, 2008      |
| rs10876864  | 12 | 54.687  | RAB5B        | 0.37 | 0.41 | 2.57E-01 | add | 0.86 [0.65-1.12] | 0.428 | 0.410 | T1D               | T1D               | Hakonarson, Diabetes 57, 2008      |
| rs1701704   | 12 | 54.699  | RAB5B        | 0.32 | 0.33 | 7.48E-01 | add | 0.96 [0.72-1.26] | 1.000 | 0.158 | T1D               | T1D               | Hakonarson, Diabetes               |
| rs11171739* | 12 | 54.757  | RAB5B        | 0.37 | 0.41 | 2.57E-01 | add | 0.86 [0.65-1.12] | 0.428 | 0.410 | T1D               | T1D               | WTCCC, Nature 447, 2007            |
| rs2292239*  | 12 | 54.768  | ERBB3        | 0.30 | 0.32 | 5.15E-01 | add | 0.91 [0.69-1.21] | 0.276 | 0.063 | T1D               | T1D               | Barrett, Nat Genet                 |
| rs2292239*  | 12 | 54.768  | ERBB3        | 0.30 | 0.32 | 5.15E-01 | add | 0.91 [0.69-1.21] | 0.276 | 0.063 | T1D               | T1D               | Cooper, Nat Genet                  |
| rs2292239*  | 12 | 54.768  | ERBB3        | 0.30 | 0.32 | 5.15E-01 | add | 0.91 [0.69-1.21] | 0.276 | 0.063 | T1D               | T1D               | Todd, Nat Genet                    |
| rs2066808   | 12 | 55.024  | STAT2        | 0.05 | 0.07 | 2.97E-01 | add | 0.73 [0.4-1.32]  | 1.000 | 0.679 | PS                | PS                | Nair, Nat Genet                    |
| rs1678542*  | 12 | 56.255  | KIF5A        | 0.34 | 0.38 | 2.47E-01 | add | 0.85 [0.64-1.12] | 0.537 | 0.580 | RA                | RA                | Raychaudhuri, Nat Genet            |
| rs10876994  | 12 | 56.351  | multiple     | NA   | NA   | NA       | NA  | NA               | NA    | NA    | MS                | MS                | Bahlo, Nat Genet 2009              |
| rs12368653  | 12 | 56.420  | CENTG1       | 0.49 | 0.49 | 6.96E-01 | add | 0.95 [0.73-1.24] | 0.138 | 0.557 | MS                | MS                | Bahlo, Nat Genet 2009              |
| rs703842*   | 12 | 56.449  | CYP27B1,     | 0.28 | 0.30 | 3.32E-01 | add | 0.86 [0.64-1.16] | 1.000 | 0.805 | MS                | MS                | Bahlo, Nat Genet 2009              |



## METTL1

|            |    |         |            |      |      |          |     |                  |       |       |                   |                                    |
|------------|----|---------|------------|------|------|----------|-----|------------------|-------|-------|-------------------|------------------------------------|
| rs7134599  | 12 | 66.786  | IL26       | NA   | NA   | NA       | NA  | NA               | NA    | NA    | UC                | Silverberg et al, Nat Genet 2009   |
| rs1558744  | 12 | 66.791  | IL26       | NA   | NA   | NA       | NA  | NA               | NA    | NA    | UC                | Silverberg, Nat Genet              |
| rs2870946  | 12 | 66.883  | IL26       | NA   | NA   | NA       | NA  | NA               | NA    | NA    | UC                | Silverberg, Nat Genet              |
| rs939898*  | 12 | 90.192  | Intergenic | 0.18 | 0.17 | 5.18E-01 | add | 1.12 [0.8-1.57]  | 0.762 | 0.377 | SLE               | Hinks et al, A&R 60, 2009          |
| rs3184504  | 12 | 110.369 | SH2B3      | NA   | NA   | NA       | NA  | NA               | NA    | NA    | T1D               | Barrett, Nat Genet                 |
| rs653178   | 12 | 110.492 | ATXN2      | NA   | NA   | NA       | NA  | NA               | NA    | NA    | CelD              | Hunt, Nat Genet                    |
| rs17696736 | 12 | 110.971 | C12orf30   | NA   | NA   | NA       | NA  | NA               | NA    | NA    | T1D               | Cooper, Nat Genet                  |
| rs17696736 | 12 | 110.971 | C12orf30   | NA   | NA   | NA       | NA  | NA               | NA    | NA    | T1D               | Todd, Nat Genet                    |
| rs17696736 | 12 | 110.971 | C12orf30   | NA   | NA   | NA       | NA  | NA               | NA    | NA    | T1D               | WTCCC, Nature 447, 2007            |
| rs1790100* | 12 | 122.223 | MPHOSPH9   | 0.24 | 0.22 | 3.38E-01 | add | 1.16 [0.86-1.58] | 1.000 | 0.683 | MS                | De Jager, Nat Genet 2009           |
| rs1385374  | 12 | 127.867 | SLC15A4    | 0.14 | 0.11 | 1.25E-01 | add | 1.34 [0.92-1.95] | 1.000 | 0.186 | SLE               | Han Nat Genet 2009                 |
| rs9550642  | 13 | 19.848  | Intergenic | NA   | NA   | NA       | NA  | NA               | NA    | NA    | RA                | WTCCC, Nature 447, 2007            |
| rs17085007 | 13 | 26.429  | Intergenic | NA   | NA   | NA       | NA  | NA               | NA    | NA    | UC                | Asano Nat Genet 2009               |
| rs3812888  | 13 | 39.128  | COG6       | NA   | NA   | NA       | NA  | NA               | NA    | NA    | PS                | Liu et al, PLoS Genetics 4, 2008   |
| rs7993214  | 13 | 39.249  | COG6       | NA   | NA   | NA       | NA  | NA               | NA    | NA    | PS                | Liu, PLoS Genet                    |
| rs9548988* | 13 | 39.404  | Intergenic | 0.47 | 0.49 | 2.47E-01 | add | 0.86 [0.66-1.11] | 0.262 | 0.120 | UC                | Barrett Nat Genet 2009             |
| rs3764147  | 13 | 43.356  | C13orf31   | 0.26 | 0.25 | 4.74E-01 | add | 1.11 [0.83-1.5]  | 0.634 | 0.130 | CD                | Barrett, Nat Genet                 |
| rs1324913  | 13 | 73.534  | KLF12      | 0.29 | 0.33 | 2.26E-01 | add | 0.84 [0.63-1.12] | 0.656 | 0.559 | RA                | Julia et al, A&R 58, 2008          |
| rs1327328* | 13 | 89.201  | Intergenic | 0.44 | 0.43 | 5.67E-01 | add | 1.08 [0.83-1.41] | 0.577 | 0.778 | MS                | Comabella et al, PLoS ONE 3, 2008  |
| rs9523762  | 13 | 92.130  | GPC5       | NA   | NA   | NA       | NA  | NA               | NA    | NA    | MS                | Baranzini, Hum Mol Genet           |
| rs1465788  | 14 | 68.333  | C14orf181  | 0.28 | 0.27 | 8.39E-01 | add | 1.03 [0.77-1.38] | 0.650 | 0.295 | T1D               | Barrett, Nat Genet                 |
| rs7159238  | 14 | 81.135  | Intergenic | NA   | NA   | NA       | NA  | NA               | NA    | NA    | CelD              | van Heel et al, Nat Genet 39, 2007 |
| rs4900384* | 14 | 97.569  | Intergenic | 0.31 | 0.28 | 2.44E-01 | add | 1.19 [0.89-1.58] | 0.134 | 0.148 | T1D               | Barrett, Nat Genet                 |
| rs8035957  | 15 | 36.626  | RASGRP1    | NA   | NA   | NA       | NA  | NA               | NA    | NA    | T1D               | Grant, Diabetes                    |
| rs3825932* | 15 | 77.023  | CTSH       | 0.33 | 0.30 | 3.27E-01 | add | 1.15 [0.87-1.52] | 0.529 | 0.967 | T1D               | Barrett, Nat Genet                 |
| rs3825932* | 15 | 77.023  | CTSH       | 0.33 | 0.30 | 3.27E-01 | add | 1.15 [0.87-1.52] | 0.529 | 0.967 | T1D               | Cooper, Nat Genet                  |
| rs11865121 | 16 | 11.074  | CLEC16A    | NA   | NA   | NA       | NA  | NA               | NA    | NA    | MS                | De Jager, Nat Genet 2009           |
| rs725613   | 16 | 11.077  | CLEC16A    | NA   | NA   | NA       | NA  | NA               | NA    | NA    | T1D               | Hakonarson et al, Nature 448, 2007 |
| rs12708716 | 16 | 11.087  | CLEC16A    | NA   | NA   | NA       | NA  | NA               | NA    | NA    | T1D               | Barrett, Nat Genet                 |
| rs12708716 | 16 | 11.087  | CLEC16A    | NA   | NA   | NA       | NA  | NA               | NA    | NA    | T1D               | Cooper, Nat Genet                  |
| rs12708716 | 16 | 11.087  | CLEC16A    | NA   | NA   | NA       | NA  | NA               | NA    | NA    | T1D               | Todd, Nat Genet                    |
| rs12708716 | 16 | 11.087  | CLEC16A    | NA   | NA   | NA       | NA  | NA               | NA    | NA    | T1D               | WTCCC, Nature 447, 2007            |
| rs2903692  | 16 | 11.146  | CLEC16A    | NA   | NA   | NA       | NA  | NA               | NA    | NA    | T1D               | Hakonarson, Nature                 |
| rs17673553 | 16 | 11.149  | CLEC16A    | NA   | NA   | NA       | NA  | NA               | NA    | NA    | T1D               | Hakonarson et al, Nature 448, 2007 |
| rs6498169* | 16 | 11.157  | CLEC16A    | 0.37 | 0.35 | 5.61E-01 | add | 1.08 [0.82-1.43] | 0.423 | 1.000 | MS                | Hafler, N Engl J Med               |
| rs416603   | 16 | 11.272  | TNP2       | NA   | NA   | NA       | NA  | NA               | NA    | NA    | T1D               | Cooper, Nat Genet                  |
| rs12444268 | 16 | 20.250  | Intergenic | NA   | NA   | NA       | NA  | NA               | NA    | NA    | T1D               | Barrett, Nat Genet                 |
| rs4788084  | 16 | 28.447  | IL27       | 0.34 | 0.39 | 6.07E-02 | add | 0.76 [0.58-1.01] | 0.835 | 0.146 | T1D               | Barrett, Nat Genet                 |
| rs8049439  | 16 | 28.745  | ATXN2L     | 0.31 | 0.38 | 3.02E-02 | add | 0.73 [0.55-0.97] | 0.521 | 0.151 | IBD (early onset) | Imielinski Nat Genet 2009          |
| rs7186852* | 16 | 30.543  | ZNF768     | 0.41 | 0.37 | 1.61E-01 | add | 1.21 [0.93-1.58] | 0.702 | 0.882 | SLE               | Han Nat Genet 2009                 |
| rs7197475  | 16 | 30.550  | ZNF768     | 0.41 | 0.37 | 1.61E-01 | add | 1.21 [0.93-1.58] | 0.702 | 0.882 | SLE               | Han Nat Genet 2009                 |

|             |    |        |              |      |      |          |     |                  |       |       |                        |                                    |
|-------------|----|--------|--------------|------|------|----------|-----|------------------|-------|-------|------------------------|------------------------------------|
| rs9888739   | 16 | 31.221 | ITGAM        | 0.12 | 0.13 | 8.26E-01 | add | 0.96 [0.64-1.43] | 0.670 | 0.939 | SLE in women           | Harley, Nat Genet                  |
| rs11150610  | 16 | 31.242 | ITGAM        | 0.40 | 0.43 | 5.84E-01 | add | 0.93 [0.71-1.21] | 1.000 | 0.245 | SLE                    | Graham, Nat Genet                  |
| rs1143678   | 16 | 31.251 | ITGAM        | 0.16 | 0.18 | 6.32E-01 | add | 0.92 [0.64-1.31] | 0.733 | 0.812 | SLE                    | Harley, Nat Genet 40, 2008         |
| rs4548893   | 16 | 31.272 | ITGAM        | 0.20 | 0.21 | 6.97E-01 | add | 0.94 [0.67-1.3]  | 1.000 | 0.644 | SLE                    | Harley, Nat Genet 40, 2008         |
| rs11574637* | 16 | 31.276 | ITGAX        | 0.16 | 0.18 | 6.32E-01 | add | 0.92 [0.64-1.31] | 0.733 | 0.812 | SLE                    | Hom, N Engl J Med                  |
| rs17221417* | 16 | 49.297 | NOD2         | 0.27 | 0.28 | 9.44E-01 | add | 0.99 [0.74-1.33] | 1.000 | 0.762 | CD                     | WTCCC, Nature 447, 2007            |
| rs2066843   | 16 | 49.303 | NOD2         | 0.27 | 0.28 | 9.44E-01 | add | 0.99 [0.74-1.33] | 1.000 | 0.762 | CD                     | Duerr et al, Science 314, 2006     |
| rs5743289   | 16 | 49.314 | NOD2         | NA   | NA   | NA       | NA  | NA               | NA    | NA    | CD                     | Libioulle, PLoS Genet              |
| rs5743289   | 16 | 49.314 | NOD2         | NA   | NA   | NA       | NA  | NA               | NA    | NA    | CD                     | Raelson, Proc Natl Acad Sci USA    |
| rs5743289   | 16 | 49.314 | NOD2         | NA   | NA   | NA       | NA  | NA               | NA    | NA    | IBD                    | Kugathasan, Nat Genet              |
| rs2076756   | 16 | 49.314 | NOD2         | NA   | NA   | NA       | NA  | NA               | NA    | NA    | CD                     | Rioux, Nat Genet                   |
| rs2076756   | 16 | 49.314 | NOD2         | NA   | NA   | NA       | NA  | NA               | NA    | NA    | IBD                    | Duerr, Science                     |
| rs2076756   | 16 | 49.314 | NOD2         | NA   | NA   | NA       | NA  | NA               | NA    | NA    | IBS                    | Franke, PLoS ONE                   |
| rs2066847   | 16 | 49.321 | NOD2         | NA   | NA   | NA       | NA  | NA               | NA    | NA    | CD                     | Barrett, Nat Genet                 |
| rs1728785*  | 16 | 67.149 | ZFP90        | 0.19 | 0.23 | 1.89E-01 | add | 0.8 [0.58-1.11]  | 1.000 | 0.074 | UC                     | Barrett Nat Genet 2009             |
| rs7199343*  | 16 | 71.567 | ZFH3         | 0.27 | 0.34 | 1.87E-02 | add | 0.7 [0.52-0.94]  | 0.641 | 0.877 | Kawasaki MS (severity) | Burgner, PLoS Genet                |
| rs7191888   | 16 | 72.139 | TXNL4B       | NA   | NA   | NA       | NA  | NA               | NA    | NA    | MS (severity)          | Baranzini, Hum Mol Genet           |
| rs7202877   | 16 | 73.805 | Intergenic   | NA   | NA   | NA       | NA  | NA               | NA    | NA    | T1D                    | Barrett, Nat Genet                 |
| rs17445836  | 16 | 84.575 | IRF8         | NA   | NA   | NA       | NA  | NA               | NA    | NA    | MS                     | De Jager, Nat Genet 2009           |
| rs16956936  | 17 | 7.574  | DNAH2        | NA   | NA   | NA       | NA  | NA               | NA    | NA    | T1D                    | Barrett, Nat Genet                 |
| rs12949531  | 17 | 13.675 | Intergenic   | NA   | NA   | NA       | NA  | NA               | NA    | NA    | SLE                    | Graham, Nat Genet                  |
| rs2872507*  | 17 | 35.294 | ORMDL3       | 0.50 | 0.49 | 6.03E-01 | add | 1.07 [0.82-1.4]  | 0.459 | 0.268 | CD                     | Barrett, Nat Genet                 |
| rs2290400   | 17 | 35.320 | GSDML        | 0.49 | 0.48 | 8.41E-01 | add | 1.03 [0.79-1.34] | 0.710 | 0.579 | T1D                    | Barrett, Nat Genet                 |
| rs7221109   | 17 | 36.024 | HNF1B, DDX52 | NA   | NA   | NA       | NA  | NA               | NA    | NA    | T1D                    | Barrett, Nat Genet                 |
| rs744166    | 17 | 37.768 | STAT3        | 0.42 | 0.42 | 8.09E-01 | add | 0.97 [0.74-1.27] | 0.340 | 0.119 | CD                     | Barrett, Nat Genet                 |
| rs2542151*  | 18 | 12.770 | PTPN2        | 0.19 | 0.16 | 2.64E-01 | add | 1.21 [0.86-1.7]  | 0.761 | 0.516 | CD                     | Barrett, Nat Genet                 |
| rs2542151*  | 18 | 12.770 | PTPN2        | 0.19 | 0.16 | 2.64E-01 | add | 1.21 [0.86-1.7]  | 0.761 | 0.516 | CD                     | Parkes, Nat Genet                  |
| rs2542151*  | 18 | 12.770 | PTPN2        | 0.19 | 0.16 | 2.64E-01 | add | 1.21 [0.86-1.7]  | 0.761 | 0.516 | CD                     | WTCCC, Nature 447, 2007            |
| rs2542151*  | 18 | 12.770 | PTPN2        | 0.19 | 0.16 | 2.64E-01 | add | 1.21 [0.86-1.7]  | 0.761 | 0.516 | T1D                    | Cooper, Nat Genet                  |
| rs2542151*  | 18 | 12.770 | PTPN2        | 0.19 | 0.16 | 2.64E-01 | add | 1.21 [0.86-1.7]  | 0.761 | 0.516 | T1D                    | Todd, Nat Genet                    |
| rs2542151*  | 18 | 12.770 | PTPN2        | 0.19 | 0.16 | 2.64E-01 | add | 1.21 [0.86-1.7]  | 0.761 | 0.516 | T1D                    | WTCCC, Nature 447, 2007            |
| rs1893217   | 18 | 12.799 | PTPN2        | 0.19 | 0.16 | 2.64E-01 | add | 1.21 [0.86-1.7]  | 0.761 | 0.516 | T1D                    | Barrett, Nat Genet                 |
| rs1557351   | 18 | 52.903 | Intergenic   | 0.25 | 0.23 | 3.28E-01 | add | 1.16 [0.86-1.58] | 0.452 | 0.377 | MS (age of onset)      | Baranzini, Hum Mol Genet           |
| rs10503019  | 18 | 53.605 | ATP8B1       | 0.22 | 0.21 | 7.74E-01 | add | 1.05 [0.76-1.44] | 0.408 | 0.464 | Vitiligo               | Birlea J Invest Dermatol 2009      |
| rs3809983   | 18 | 54.354 | ALPK2        | NA   | NA   | NA       | NA  | NA               | NA    | NA    | CelD                   | van Heel et al, Nat Genet 39, 2007 |
| rs3809982*  | 18 | 54.354 | ALPK2        | 0.46 | 0.48 | 7.03E-01 | add | 0.95 [0.73-1.23] | 0.851 | 0.101 | CelD                   | van Heel et al, Nat Genet 39, 2007 |
| rs937815    | 18 | 54.719 | ZNF532       | 0.11 | 0.09 | 5.73E-01 | add | 1.13 [0.74-1.74] | 1.000 | 0.467 | CD                     | Rioux et al, Nat Genet 39, 2007    |
| rs763361*   | 18 | 65.683 | CD226        | 0.46 | 0.50 | 1.20E-01 | add | 0.81 [0.62-1.06] | 0.189 | 0.890 | T1D                    | Todd, Nat Genet                    |
| rs17083844  | 18 | 66.993 | SOCS6        | NA   | NA   | NA       | NA  | NA               | NA    | NA    | SLE                    | Hom, N Engl J Med                  |
| rs337718    | 18 | 67.925 | SOCS6        | 0.30 | 0.30 | 8.41E-01 | add | 1.03 [0.77-1.37] | 0.377 | 0.836 | MS (severity)          | Baranzini, Hum Mol Genet           |

|            |    |         |                   |      |      |          |     |                  |       |       |                      |                               |
|------------|----|---------|-------------------|------|------|----------|-----|------------------|-------|-------|----------------------|-------------------------------|
| rs2002842  | 18 | 74.511  | SALL3             | NA   | NA   | NA       | NA  | NA               | NA    | NA    | RA                   | Julia, Arthritis Rheum        |
| rs7253363  | 19 | 11.543  | PRKCSH            | NA   | NA   | NA       | NA  | NA               | NA    | NA    | MS<br>(severity)     | Baranzini, Hum Mol Genet      |
| rs10500264 | 19 | 38.442  | CEBPA,<br>SLC7A10 | 0.16 | 0.17 | 8.88E-01 | add | 0.98 [0.69-1.39] | 0.492 | 0.027 | IBD (early<br>onset) | Imielinski Nat Genet 2009     |
| rs8111071  | 19 | 50.999  | RSHL1             | 0.07 | 0.11 | 1.51E-01 | add | 0.69 [0.42-1.14] | 1.000 | 0.586 | CD                   | WTCCC, Nature 447, 2007       |
| rs425105   | 19 | 51.900  | PRKD2             | 0.15 | 0.16 | 6.84E-01 | add | 0.93 [0.64-1.34] | 0.721 | 0.650 | T1D                  | Barrett, Nat Genet            |
| rs299175   | 19 | 61.005  | NLRP11            | 0.49 | 0.45 | 2.32E-01 | add | 1.17 [0.9-1.52]  | 1.000 | 0.124 | MS<br>(severity)     | Baranzini, Hum Mol Genet      |
| rs397020   | 20 | 1.154   | PSMF1             | NA   | NA   | NA       | NA  | NA               | NA    | NA    | MS                   | Baranzini, Hum Mol Genet      |
| rs2281808  | 20 | 1.559   | SIRPG             | NA   | NA   | NA       | NA  | NA               | NA    | NA    | T1D                  | Barrett, Nat Genet            |
| rs6017342  | 20 | 42.498  | HNF4A             | NA   | NA   | NA       | NA  | NA               | NA    | NA    | UC                   | Barrett Nat Genet 2009        |
| rs6131010  | 20 | 44.158  | CD40              | NA   | NA   | NA       | NA  | NA               | NA    | NA    | MS                   | Bahlo, Nat Genet 2009         |
| rs6074022  | 20 | 44.174  | CD40              | 0.28 | 0.27 | 5.00E-01 | add | 1.11 [0.82-1.49] | 0.647 | 0.691 | MS                   | Bahlo, Nat Genet 2009         |
| rs1569723* | 20 | 44.175  | CD40              | 0.28 | 0.27 | 5.00E-01 | add | 1.11 [0.82-1.49] | 0.647 | 0.691 | MS                   | Bahlo, Nat Genet 2009         |
| rs4810485  | 20 | 44.181  | CD40              | NA   | NA   | NA       | NA  | NA               | NA    | NA    | RA                   | Raychaudhuri, Nat Genet       |
| rs495337*  | 20 | 47.956  | SPATA2            | 0.35 | 0.39 | 1.58E-01 | add | 0.82 [0.62-1.08] | 0.838 | 0.884 | PS                   | Capon, Hum Mol Genet          |
| rs2315008  | 20 | 61.814  | ZGPAT             | 0.32 | 0.30 | 6.24E-01 | add | 1.07 [0.81-1.42] | 1.000 | 0.902 | IBD                  | Kugathasan, Nat Genet         |
| rs1736135* | 21 | 15.727  | TNFRSF6B          | 0.40 | 0.43 | 2.68E-01 | add | 0.86 [0.66-1.12] | 0.438 | 0.943 | CD                   | Barrett, Nat Genet            |
| rs2833607  | 21 | 32.303  | Intergenic        | 0.19 | 0.23 | 1.21E-01 | add | 0.77 [0.55-1.07] | 1.000 | 0.772 | Vitiligo             | Birlea J Invest Dermatol 2009 |
| rs2836754  | 21 | 39.214  | FLJ45139          | NA   | NA   | NA       | NA  | NA               | NA    | NA    | CD                   | Parkes, Nat Genet             |
| rs2836878  | 21 | 39.387  | PSMG1             | 0.29 | 0.27 | 3.38E-01 | add | 1.15 [0.86-1.53] | 0.262 | 0.825 | IBD                  | Kugathasan, Nat Genet         |
| rs2837960  | 21 | 41.434  | Intergenic        | NA   | NA   | NA       | NA  | NA               | NA    | NA    | RA                   | WTCCC, Nature 447, 2007       |
| rs11203203 | 21 | 42.709  | UBASH3A           | NA   | NA   | NA       | NA  | NA               | NA    | NA    | T1D                  | Barrett, Nat Genet            |
| rs9976767  | 21 | 42.709  | UBASH3A           | 0.43 | 0.45 | 6.34E-01 | add | 0.94 [0.72-1.22] | 0.705 | 1.000 | T1D                  | Grant, Diabetes               |
| rs762421   | 21 | 44.440  | ICOSLG            | NA   | NA   | NA       | NA  | NA               | NA    | NA    | CD                   | Barrett, Nat Genet            |
| rs131654   | 22 | 20.247  | UBE2L3            | NA   | NA   | NA       | NA  | NA               | NA    | NA    | SLE                  | Han Nat Genet 2009            |
| rs5754217  | 22 | 20.270  | UBE2L3            | 0.21 | 0.18 | 2.20E-01 | add | 1.22 [0.89-1.69] | 0.047 | 0.773 | SLE                  | Harley, Nat Genet 40, 2008    |
| rs2412973* | 22 | 28.860  | HORMAD2           | 0.50 | 0.47 | 3.86E-01 | add | 1.12 [0.86-1.47] | 0.265 | 0.282 | IBD (early<br>onset) | Imielinski Nat Genet 2009     |
| rs5753037* | 22 | 28.912  | LOC729980         | 0.32 | 0.37 | 7.67E-02 | add | 0.77 [0.58-1.03] | 0.669 | 0.003 | T1D                  | Barrett, Nat Genet            |
| rs743777*  | 22 | 35.882  | RASD2, MCM5       | 0.31 | 0.31 | 9.78E-01 | add | 1 [0.75-1.34]    | 0.200 | 0.291 | RA                   | WTCCC, Nature 447, 2007       |
| rs229541   | 22 | 35.921  | RASD2, MCM5       | NA   | NA   | NA       | NA  | NA               | NA    | NA    | T1D                  | Barrett, Nat Genet            |
| rs229541   | 22 | 35.921  | RASD2, MCM5       | NA   | NA   | NA       | NA  | NA               | NA    | NA    | T1D                  | Cooper, Nat Genet             |
| rs2071725  | 22 | 41.940  | SCUBE1            | 0.12 | 0.14 | 3.40E-01 | add | 0.82 [0.54-1.23] | 1.000 | 0.389 | SLE                  | Harley, Nat Genet 40, 2008    |
| rs2664170  | X  | 153.599 | GAB3              | NA   | NA   | NA       | NA  | NA               | NA    | NA    | T1D                  | Barrett, Nat Genet            |

\* Association results reported for proxy ( $r^2 > 0.8$  and  $< 500$  kb distance) for the autoimmune disease SNP listed. Chr – chromosome, Pos – position, MAF – Minor Allele Frequency, genetic transmission model: add – additive, rec - recessive, dom – dominant, OR – odds ratio, CI – 95% confidence interval, HWE – Hardy Weinberg Equilibrium, Ref – reference, NA – not available (SNP not genotyped or failed quality control criteria defined in the Methods, RA – rheumatoid arthritis, SLE – systemic lupus erythematosus, T1D – type 1 diabetes, MS – multiple sclerosis, IBD - inflammatory bowel disease, IBS - inflammatory bowel syndrome, CD – Crohn's disease, UC – ulcerative colitis, CeID – celiac disease, PS – psoriasis, PsA – psoriatic arthritis, JIA – juvenile idiopathic arthritis, BD – Behcet's disease, Sarc – sarcoidosis.
